# Supplementary material for: The Canadian Cow-Calf Surveillance Network – productivity and health summary 2018 to 2022
Source: PubMed Central journal article supplement (PMC11040676; doi:10.3389/fvets.2024.1392166), 2024-04-10
Supplement: Table_1.pdf [file Table_1.pdf]

**Supplemental table 1:**

**The Canadian Cow-calf Surveillance Network – Productivity and Health Data 2018 to 2022**

**Cheryl Waldner<sup>1\*</sup>, M. Claire Windeyer<sup>2</sup>, Marjolaine Rousseau<sup>3</sup>, John Campbell<sup>1</sup>**

<sup>1</sup>Large Animal Clinical Sciences, University of Saskatchewan, Saskatoon, SK, Canada

<sup>2</sup>Faculty of Veterinary Medicine, University of Calgary, Calgary, AB, Canada

<sup>3</sup>Département de sciences cliniques, Faculté de médecine vétérinaire, Université de Montréal, Saint-Hyacinthe, QC, Canada

**Table S1.** Summary of cattle purchases between weaning the previous year and the start of breeding season as well as the percentage of the herd that is purebred from Canadian cow-calf herds reported in submitted annual herd calving records (n=565) for the C3SN between 2019 and 2022.

|                               | Cattle purchased between last weaning date the previous year and before turn-out date for breeding in current year |                                    |                          |                             |                           | Percentage of herd that is purebred |
|-------------------------------|--------------------------------------------------------------------------------------------------------------------|------------------------------------|--------------------------|-----------------------------|---------------------------|-------------------------------------|
|                               | Number of calves purchased                                                                                         | Number of cow-calf pairs purchased | Number of cows purchased | Number of heifers purchased | Number of bulls purchased |                                     |
| Total herd records            | N = 565                                                                                                            | N = 565                            | N = 565                  | N = 565                     | N = 565                   | N = 565                             |
| Mean                          | 1                                                                                                                  | 0                                  | 3                        | 5                           | 2                         | 17                                  |
| SD*                           | 7                                                                                                                  | 2                                  | 10                       | 20                          | 2                         | 31                                  |
| 2.5 <sup>th</sup> percentile  | 0                                                                                                                  | 0                                  | 0                        | 0                           | 0                         | 0                                   |
| 5 <sup>th</sup> percentile    | 0                                                                                                                  | 0                                  | 0                        | 0                           | 0                         | 0                                   |
| 25 <sup>th</sup> percentile   | 0                                                                                                                  | 0                                  | 0                        | 0                           | 0                         | 0                                   |
| Median                        | 0                                                                                                                  | 0                                  | 0                        | 0                           | 1                         | 0                                   |
| 75 <sup>th</sup> percentile   | 0                                                                                                                  | 0                                  | 0                        | 2                           | 3                         | 20                                  |
| 95 <sup>th</sup> percentile   | 1                                                                                                                  | 0                                  | 16                       | 25                          | 6                         | 99                                  |
| 97.5 <sup>th</sup> percentile | 3                                                                                                                  | 3                                  | 36                       | 40                          | 8                         | 100                                 |

\*Standard deviation
