# Supplementary material for: The Canadian Cow-Calf Surveillance Network – productivity and health summary 2018 to 2022
Source: PubMed Central journal article supplement (PMC11040676; doi:10.3389/fvets.2024.1392166), 2024-04-10
Supplement: Table_3.pdf [file Table_3.pdf]

**Supplemental tables 3a, 3b:**

## **The Canadian Cow-calf Surveillance Network – Productivity and Health Data 2018 to 2022**

**Cheryl Waldner<sup>1\*</sup>, M. Claire Windeyer<sup>2</sup>, Marjolaine Rousseau<sup>3</sup>, John Campbell<sup>1</sup>**

<sup>1</sup>Large Animal Clinical Sciences, University of Saskatchewan, Saskatoon, SK, Canada

<sup>2</sup>Faculty of Veterinary Medicine, University of Calgary, Calgary, AB, Canada

<sup>3</sup>Département de sciences cliniques, Faculté de médecine vétérinaire, Université de Montréal, Saint-Hyacinthe, QC, Canada

**Table S3a.** Summary of pregnancy outcome indicators from **Western Canadian** cow-calf herds reported in submitted annual herd calving records (n=379) for the C3SN between 2019 and 2022.

|                               | Number calving |         |       | Percent of pregnant cows that aborted |         |       | Percent of calves dead with 24 h |         |       | Percent of calving females with twins |         |       |
|-------------------------------|----------------|---------|-------|---------------------------------------|---------|-------|----------------------------------|---------|-------|---------------------------------------|---------|-------|
|                               | Cows           | Heifers | Total | Cows                                  | Heifers | Total | Cows                             | Heifers | Total | Cows                                  | Heifers | Total |
| Total herd records            | N=379          | N=357   | N=379 | N=373                                 | N=355   | N=373 | N=378                            | N=358   | N=378 | N=379                                 | N=358   | N=379 |
| Mean                          | 206            | 42      | 245   | 1.5%                                  | 3.0%    | 1.8%  | 2.1%                             | 3.7%    | 2.4%  | 2.8%                                  | 1.3%    | 2.5%  |
| SD*                           | 162            | 38      | 193   | 1.7%                                  | 9.4%    | 2.7%  | 1.7%                             | 4.3%    | 1.7%  | 2.0%                                  | 2.4%    | 1.8%  |
| 2.5 <sup>th</sup> percentile  | 37             | 8       | 48    | 0.0%                                  | 0.0%    | 0.0%  | 0.0%                             | 0.0%    | 0.0%  | 0.0%                                  | 0.0%    | 0.0%  |
| 5 <sup>th</sup> percentile    | 48             | 9       | 60    | 0.0%                                  | 0.0%    | 0.0%  | 0.0%                             | 0.0%    | 0.0%  | 0.0%                                  | 0.0%    | 0.0%  |
| 25 <sup>th</sup> percentile   | 101            | 18      | 121   | 0.6%                                  | 0.0%    | 0.7%  | 1.0%                             | 0.0%    | 1.2%  | 0.0%                                  | 0.0%    | 0.0%  |
| Median                        | 169            | 32      | 200   | 1.1%                                  | 0.0%    | 1.3%  | 1.8%                             | 2.8%    | 2.1%  | 1.2%                                  | 0.0%    | 1.3%  |
| 75 <sup>th</sup> percentile   | 263            | 53      | 311   | 2.1%                                  | 3.5%    | 2.2%  | 3.1%                             | 5.7%    | 3.3%  | 2.4%                                  | 0.0%    | 2.2%  |
| 95 <sup>th</sup> percentile   | 470            | 103     | 589   | 4.4%                                  | 9.2%    | 4.5%  | 5.3%                             | 11.1%   | 5.7%  | 3.7%                                  | 2.0%    | 3.4%  |
| 97.5 <sup>th</sup> percentile | 754            | 149     | 885   | 5.7%                                  | 12.9%   | 6.5%  | 6.0%                             | 14.3%   | 6.2%  | 6.7%                                  | 6.7%    | 5.9%  |

\*Standard deviation

**Table S3b.** Summary of pregnancy outcome indicators from **Eastern Canadian** cow-calf herds reported in submitted annual herd calving records (n=186) for the C3SN between 2019 and 2022.

|                               | Number calving |         |       | Percent of pregnant cows that aborted |         |       | Percent of calves dead with 24 h |         |       | Percent of calving females with twins |         |       |
|-------------------------------|----------------|---------|-------|---------------------------------------|---------|-------|----------------------------------|---------|-------|---------------------------------------|---------|-------|
|                               | Cows           | Heifers | Total | Cows                                  | Heifers | Total | Cows                             | Heifers | Total | Cows                                  | Heifers | Total |
| Total herd records            | N=186          | N=163   | N=186 | N=186                                 | N=163   | N=186 | N=185                            | N=164   | N=185 | N=185                                 | N=165   | N=185 |
| Mean                          | 83             | 14      | 95    | 1.6%                                  | 2.6%    | 1.7%  | 3.3%                             | 4.4%    | 3.4%  | 3.9%                                  | 1.5%    | 3.6%  |
| SD*                           | 75             | 16      | 88    | 2.3%                                  | 9.2%    | 2.3%  | 3.0%                             | 8.0%    | 2.9%  | 3.4%                                  | 4.8%    | 3.1%  |
| 2.5 <sup>th</sup> percentile  | 23             | 1       | 26    | 0.0%                                  | 0.0%    | 0.0%  | 0.0%                             | 0.0%    | 0.0%  | 0.0%                                  | 0.0%    | 0.0%  |
| 5 <sup>th</sup> percentile    | 27             | 3       | 30    | 0.0%                                  | 0.0%    | 0.0%  | 0.0%                             | 0.0%    | 0.0%  | 0.0%                                  | 0.0%    | 0.0%  |
| 25 <sup>th</sup> percentile   | 39             | 6       | 45    | 0.0%                                  | 0.0%    | 0.0%  | 1.1%                             | 0.0%    | 1.3%  | 1.6%                                  | 0.0%    | 1.5%  |
| Median                        | 63             | 10      | 73    | 1.0%                                  | 0.0%    | 1.1%  | 2.7%                             | 0.0%    | 2.7%  | 3.1%                                  | 0.0%    | 2.9%  |
| 75 <sup>th</sup> percentile   | 91             | 16      | 104   | 2.5%                                  | 0.0%    | 2.5%  | 4.8%                             | 6.7%    | 4.7%  | 5.1%                                  | 0.0%    | 4.8%  |
| 95 <sup>th</sup> percentile   | 223            | 45      | 254   | 5.4%                                  | 14.1%   | 5.1%  | 9.4%                             | 20.0%   | 9.3%  | 11.0%                                 | 9.1%    | 9.0%  |
| 97.5 <sup>th</sup> percentile | 272            | 50      | 290   | 7.4%                                  | 24.6%   | 8.3%  | 10.8%                            | 25.0%   | 10.4% | 11.8%                                 | 12.4%   | 10.8% |

\*Standard deviation
