# Supplementary material for: The Canadian Cow-Calf Surveillance Network – productivity and health summary 2018 to 2022
Source: PubMed Central journal article supplement (PMC11040676; doi:10.3389/fvets.2024.1392166), 2024-04-10
Supplement: Table_4.pdf [file Table_4.pdf]

**Supplemental tables 4a, 4b:**

## **The Canadian Cow-calf Surveillance Network – Productivity and Health Data 2018 to 2022**

**Cheryl Waldner<sup>1\*</sup>, M. Claire Windeyer<sup>2</sup>, Marjolaine Rousseau<sup>3</sup>, John Campbell<sup>1</sup>**

<sup>1</sup>Large Animal Clinical Sciences, University of Saskatchewan, Saskatoon, SK, Canada

<sup>2</sup>Faculty of Veterinary Medicine, University of Calgary, Calgary, AB, Canada

<sup>3</sup>Département de sciences cliniques, Faculté de médecine vétérinaire, Université de Montréal, Saint-Hyacinthe, QC, Canada

**Table S4a.** Summary of calving difficulty outcomes from **Western Canadian** cow-calf herds reported in submitted annual herd calving records (n=379) for the C3SN between 2019 and 2022.

|                               | Percent of females calved assisted |         |       | Percent of females with easy pull* |         |       | Percent of females with hard pull** |         |       | Percent of females with Caesarean section |         |       |
|-------------------------------|------------------------------------|---------|-------|------------------------------------|---------|-------|-------------------------------------|---------|-------|-------------------------------------------|---------|-------|
|                               | Cows                               | Heifers | Total | Cows                               | Heifers | Total | Cows                                | Heifers | Total | Cows                                      | Heifers | Total |
| Total herd records            | N=379                              | N=359   | N=379 | N=377                              | N=377   | N=357 | N=377                               | N=357   | N=379 | N=376                                     | N=358   | N=379 |
| Mean                          | 4.5%                               | 16.2%   | 6.4%  | 2.7%                               | 9.3%    | 3.8%  | 1.4%                                | 6.1%    | 2.1%  | 0.2%                                      | 0.9%    | 0.3%  |
| SD***                         | 7.0%                               | 14.3%   | 7.6%  | 4.0%                               | 10.2%   | 4.7%  | 2.1%                                | 8.0%    | 2.7%  | 0.4%                                      | 2.4%    | 0.6%  |
| 2.5 <sup>th</sup> percentile  | 0.0%                               | 0.0%    | 0.0%  | 0.0%                               | 0.0%    | 0.0%  | 0.0%                                | 0.0%    | 0.0%  | 0.0%                                      | 0.0%    | 0.0%  |
| 5 <sup>th</sup> percentile    | 0.0%                               | 0.0%    | 0.0%  | 0.0%                               | 0.0%    | 0.0%  | 0.0%                                | 0.0%    | 0.0%  | 0.0%                                      | 0.0%    | 0.0%  |
| 25 <sup>th</sup> percentile   | 0.9%                               | 5.4%    | 2.1%  | 0.0%                               | 0.5%    | 1.0%  | 0.0%                                | 0.0%    | 0.4%  | 0.0%                                      | 0.0%    | 0.0%  |
| Median                        | 2.3%                               | 12.5%   | 4.1%  | 1.2%                               | 6.7%    | 2.3%  | 0.7%                                | 3.3%    | 1.2%  | 0.0%                                      | 0.0%    | 0.0%  |
| 75 <sup>th</sup> percentile   | 5.5%                               | 23.6%   | 8.4%  | 3.3%                               | 13.0%   | 4.9%  | 1.7%                                | 9.1%    | 2.8%  | 0.0%                                      | 0.0%    | 0.3%  |
| 95 <sup>th</sup> percentile   | 14.3%                              | 44.5%   | 19.0% | 10.5%                              | 29.4%   | 12.2% | 6.2%                                | 21.9%   | 7.5%  | 1.0%                                      | 6.4%    | 1.5%  |
| 97.5 <sup>th</sup> percentile | 20.0%                              | 50.9%   | 24.4% | 13.3%                              | 36.9%   | 14.4% | 7.9%                                | 28.7%   | 9.5%  | 1.3%                                      | 8.0%    | 2.0%  |

\* one person only assist

\*\* two person assist or required mechanical aid (e.g., calf jack)

\*\*\*Standard deviation

**Table S4b.** Summary of calving difficulty outcomes from **Eastern Canadian** cow-calf herds reported in submitted annual herd calving records (n=186) for the C3SN between 2019 and 2022.

|                               | Percent of females calved assisted |         |       | Percent of females with easy pull* |         |       | Percent of females with hard pull** |         |       | Percent with Caesarean section |         |       |
|-------------------------------|------------------------------------|---------|-------|------------------------------------|---------|-------|-------------------------------------|---------|-------|--------------------------------|---------|-------|
|                               | Cows                               | Heifers | Total | Cows                               | Heifers | Total | Cows                                | Heifers | Total | Cows                           | Heifers | Total |
| Total herd records            | N=183                              | N=163   | N=183 | N=182                              | N=162   | N=182 | N=183                               | N=163   | N=183 | N=182                          | N=164   | N=182 |
| Mean                          | 7.4%                               | 24.4%   | 9.5%  | 5.8%                               | 12.3%   | 6.6%  | 3.0%                                | 13.3%   | 4.2%  | 0.1%                           | 0.1%    | 0.1%  |
| SD***                         | 8.8%                               | 24.9%   | 10.0% | 12.5%                              | 16.7%   | 12.1% | 4.1%                                | 19.7%   | 5.0%  | 0.4%                           | 0.6%    | 0.4%  |
| 2.5 <sup>th</sup> percentile  | 0.0%                               | 0.0%    | 0.0%  | 0.0%                               | 0.0%    | 0.0%  | 0.0%                                | 0.0%    | 0.0%  | 0.0%                           | 0.0%    | 0.0%  |
| 5 <sup>th</sup> percentile    | 0.0%                               | 0.0%    | 0.0%  | 0.0%                               | 0.0%    | 0.0%  | 0.0%                                | 0.0%    | 0.0%  | 0.0%                           | 0.0%    | 0.0%  |
| 25 <sup>th</sup> percentile   | 1.7%                               | 2.7%    | 2.5%  | 0.0%                               | 0.0%    | 0.7%  | 0.0%                                | 0.0%    | 0.9%  | 0.0%                           | 0.0%    | 0.0%  |
| Median                        | 4.4%                               | 18.8%   | 6.7%  | 2.1%                               | 5.9%    | 2.9%  | 1.6%                                | 6.7%    | 2.3%  | 0.0%                           | 0.0%    | 0.0%  |
| 75 <sup>th</sup> percentile   | 9.5%                               | 37.5%   | 13.2% | 6.6%                               | 19.5%   | 7.4%  | 4.0%                                | 20.0%   | 5.9%  | 0.0%                           | 0.0%    | 0.0%  |
| 95 <sup>th</sup> percentile   | 24.9%                              | 79.3%   | 27.7% | 20.5%                              | 50.0%   | 21.5% | 11.6%                               | 50.0%   | 14.8% | 0.0%                           | 0.0%    | 0.3%  |
| 97.5 <sup>th</sup> percentile | 29.3%                              | 90.5%   | 33.3% | 43.4%                              | 57.1%   | 47.3% | 15.7%                               | 54.5%   | 18.9% | 1.6%                           | 0.0%    | 1.4%  |

\* one-person only assist

\*\* two-person assist or required mechanical aid (e.g., calf jack)

\*\*\*Standard deviation
