# Supplementary material for: The Canadian Cow-Calf Surveillance Network – productivity and health summary 2018 to 2022
Source: PubMed Central journal article supplement (PMC11040676; doi:10.3389/fvets.2024.1392166), 2024-04-10
Supplement: Table_5.pdf [file Table_5.pdf]

**Supplemental tables 5a, 5b:**

## **The Canadian Cow-calf Surveillance Network – Productivity and Health Data 2018 to 2022**

**Cheryl Waldner<sup>1\*</sup>, M. Claire Windeyer<sup>2</sup>, Marjolaine Rousseau<sup>3</sup>, John Campbell<sup>1</sup>**

<sup>1</sup>Large Animal Clinical Sciences, University of Saskatchewan, Saskatoon, SK, Canada

<sup>2</sup>Faculty of Veterinary Medicine, University of Calgary, Calgary, AB, Canada

<sup>3</sup>Département de sciences cliniques, Faculté de médecine vétérinaire, Université de Montréal, Saint-Hyacinthe, QC, Canada

**Table S5a.** Summary of calving sickness and death loss from 24 hours to 30 days from **Western Canadian** cow-calf herds reported in submitted annual herd calving records (n=379) for the C3SN between 2019 and 2022.

|                               | Percent of calves dead 24 h to 30 d |         |       | Percent of calves reported treated with antibiotics 24 h to 30 d |                     |                          | Percent of calves dead with attributed cause 24 h to 30 d |                     |                          |       |
|-------------------------------|-------------------------------------|---------|-------|------------------------------------------------------------------|---------------------|--------------------------|-----------------------------------------------------------|---------------------|--------------------------|-------|
|                               | Cows                                | Heifers | Total | Calf diarrhea                                                    | Respiratory disease | Navel or joint infection | Calf diarrhea                                             | Respiratory disease | Navel or joint infection | Total |
| Total herd records            | N=378                               | N=356   | N=378 | N=376                                                            | N=374               | N=374                    | N=375                                                     | N=375               | N=375                    | N=375 |
| Mean                          | 1.6%                                | 1.9%    | 1.7%  | 2.4%                                                             | 2.8%                | 1.8%                     | 0.4%                                                      | 0.3%                | 0.1%                     | 0.7%  |
| SD*                           | 1.6%                                | 3.5%    | 1.6%  | 4.4%                                                             | 5.0%                | 3.5%                     | 0.9%                                                      | 0.6%                | 0.3%                     | 1.2%  |
| 2.5 <sup>th</sup> percentile  | 0.0%                                | 0.0%    | 0.0%  | 0.0%                                                             | 0.0%                | 0.0%                     | 0.0%                                                      | 0.0%                | 0.0%                     | 0.0%  |
| 5 <sup>th</sup> percentile    | 0.0%                                | 0.0%    | 0.0%  | 0.0%                                                             | 0.0%                | 0.0%                     | 0.0%                                                      | 0.0%                | 0.0%                     | 0.0%  |
| 25 <sup>th</sup> percentile   | 0.5%                                | 0.0%    | 0.6%  | 0.0%                                                             | 0.0%                | 0.0%                     | 0.0%                                                      | 0.0%                | 0.0%                     | 0.0%  |
| Median                        | 1.1%                                | 0.0%    | 1.2%  | 0.9%                                                             | 0.9%                | 0.6%                     | 0.0%                                                      | 0.0%                | 0.0%                     | 0.3%  |
| 75 <sup>th</sup> percentile   | 2.3%                                | 2.6%    | 2.3%  | 2.6%                                                             | 2.9%                | 1.8%                     | 0.5%                                                      | 0.4%                | 0.0%                     | 0.9%  |
| 95 <sup>th</sup> percentile   | 4.5%                                | 9.6%    | 4.6%  | 9.4%                                                             | 12.2%               | 8.3%                     | 1.9%                                                      | 1.4%                | 0.6%                     | 3.1%  |
| 97.5 <sup>th</sup> percentile | 5.7%                                | 11.1%   | 5.9%  | 16.1%                                                            | 16.9%               | 11.5%                    | 2.5%                                                      | 1.8%                | 0.8%                     | 4.1%  |

\*Standard deviation

**Table S5b.** Summary of calving sickness and death loss from 24 hours to 30 days from **Eastern Canadian** cow-calf herds reported in submitted annual herd calving records (n=186) for the C3SN between 2019 and 2022.

|                               | Percent of calves dead 24 h to 30 d |         |       | Percent of calves reported treated with antibiotics 24 h to 30 d |                     |                          | Percent of calves dead with attributed cause 24 h to 30 d |                     |                          |       |
|-------------------------------|-------------------------------------|---------|-------|------------------------------------------------------------------|---------------------|--------------------------|-----------------------------------------------------------|---------------------|--------------------------|-------|
|                               | Cows                                | Heifers | Total | Calf diarrhea                                                    | Respiratory disease | Navel or joint infection | Calf diarrhea                                             | Respiratory disease | Navel or joint infection | Total |
| Total herd records            | N=184                               | N=165   | N=184 | N=181                                                            | N=184               | N=182                    | N=183                                                     | N=183               | N=183                    | N=183 |
| Mean                          | 2.3%                                | 3.1%    | 2.4%  | 7.0%                                                             | 3.7%                | 3.0%                     | 0.7%                                                      | 0.5%                | 0.2%                     | 1.5%  |
| SD*                           | 2.8%                                | 9.2%    | 2.9%  | 12.2%                                                            | 6.8%                | 5.0%                     | 1.8%                                                      | 2.0%                | 1.1%                     | 3.2%  |
| 2.5 <sup>th</sup> percentile  | 0.0%                                | 0.0%    | 0.0%  | 0.0%                                                             | 0.0%                | 0.0%                     | 0.0%                                                      | 0.0%                | 0.0%                     | 0.0%  |
| 5 <sup>th</sup> percentile    | 0.0%                                | 0.0%    | 0.0%  | 0.0%                                                             | 0.0%                | 0.0%                     | 0.0%                                                      | 0.0%                | 0.0%                     | 0.0%  |
| 25 <sup>th</sup> percentile   | 0.0%                                | 0.0%    | 0.0%  | 0.0%                                                             | 0.0%                | 0.0%                     | 0.0%                                                      | 0.0%                | 0.0%                     | 0.0%  |
| Median                        | 1.6%                                | 0.0%    | 1.8%  | 3.4%                                                             | 1.0%                | 1.0%                     | 0.0%                                                      | 0.0%                | 0.0%                     | 0.0%  |
| 75 <sup>th</sup> percentile   | 2.9%                                | 0.0%    | 3.4%  | 9.1%                                                             | 4.7%                | 4.0%                     | 0.5%                                                      | 0.0%                | 0.0%                     | 2.0%  |
| 95 <sup>th</sup> percentile   | 6.6%                                | 14.3%   | 7.7%  | 23.5%                                                            | 15.2%               | 14.2%                    | 3.8%                                                      | 2.5%                | 1.0%                     | 7.1%  |
| 97.5 <sup>th</sup> percentile | 10.8%                               | 19.7%   | 9.8%  | 42.1%                                                            | 21.1%               | 17.9%                    | 5.7%                                                      | 3.4%                | 1.9%                     | 9.9%  |

\*Standard deviation
