# Supplementary material for: The Canadian Cow-Calf Surveillance Network – productivity and health summary 2018 to 2022
Source: PubMed Central journal article supplement (PMC11040676; doi:10.3389/fvets.2024.1392166), 2024-04-10
Supplement: Table_6.pdf [file Table_6.pdf]

**Supplemental tables 6a, 6b:**

## **The Canadian Cow-calf Surveillance Network – Productivity and Health Data 2018 to 2022**

**Cheryl Waldner<sup>1\*</sup>, M. Claire Windeyer<sup>2</sup>, Marjolaine Rousseau<sup>3</sup>, John Campbell<sup>1</sup>**

<sup>1</sup>Large Animal Clinical Sciences, University of Saskatchewan, Saskatoon, SK, Canada

<sup>2</sup>Faculty of Veterinary Medicine, University of Calgary, Calgary, AB, Canada

<sup>3</sup>Département de sciences cliniques, Faculté de médecine vétérinaire, Université de Montréal, Saint-Hyacinthe, QC, Canada

**Table S6a.** Summary of breeding stock and female to bull ratios for **Western Canadian** cow-calf herds reported in submitted annual herd breeding to weaning records (n=364) for the C3SN between 2019 and 2022.

|                               | Bulls bred to cows | Bulls bred to heifers | Cows exposed to breeding | Heifers exposed to breeding | Cow to bull ratio | Heifer to bull ratio |
|-------------------------------|--------------------|-----------------------|--------------------------|-----------------------------|-------------------|----------------------|
| Total herd records            | N=363              | N=348                 | N=363                    | N=350                       | N=360             | N=323                |
| Mean                          | 10                 | 2                     | 231                      | 51                          | 23                | 18                   |
| SD*                           | 8                  | 3                     | 183                      | 50                          | 7                 | 9                    |
| 2.5 <sup>th</sup> percentile  | 2                  | 1                     | 38                       | 5                           | 9                 | 2                    |
| 5 <sup>th</sup> percentile    | 2                  | 1                     | 54                       | 10                          | 13                | 3                    |
| 25 <sup>th</sup> percentile   | 5                  | 1                     | 115                      | 20                          | 19                | 12                   |
| Median                        | 8                  | 2                     | 189                      | 35                          | 22                | 18                   |
| 75 <sup>th</sup> percentile   | 12                 | 3                     | 292                      | 63                          | 27                | 24                   |
| 95 <sup>th</sup> percentile   | 25                 | 5                     | 556                      | 136                         | 34                | 33                   |
| 97.5 <sup>th</sup> percentile | 40                 | 6                     | 882                      | 208                         | 36                | 36                   |

\*Standard deviation

**Table S6b.** Summary of breeding stock and female to bull ratios for **Eastern Canadian** cow-calf herds reported in submitted annual herd breeding to weaning records (n=179) for the C3SN between 2019 and 2022.

|                               | Bulls bred to cows | Bulls bred to heifers | Cows exposed to breeding | Heifers exposed to breeding | Cow to bull ratio | Heifer to bull ratio |
|-------------------------------|--------------------|-----------------------|--------------------------|-----------------------------|-------------------|----------------------|
| Total herd records            | N=179              | N=164                 | N=179                    | N=167                       | N=175             | N=125                |
| Mean                          | 4                  | 1                     | 90                       | 15                          | 24                | 12                   |
| SD*                           | 4                  | 1                     | 76                       | 19                          | 13                | 13                   |
| 2.5 <sup>th</sup> percentile  | 1                  | 0                     | 18                       | 0                           | 4                 | 1                    |
| 5 <sup>th</sup> percentile    | 1                  | 0                     | 32                       | 1                           | 6                 | 1                    |
| 25 <sup>th</sup> percentile   | 2                  | 1                     | 46                       | 6                           | 15                | 5                    |
| Median                        | 3                  | 1                     | 71                       | 10                          | 22                | 8                    |
| 75 <sup>th</sup> percentile   | 4                  | 1                     | 103                      | 16                          | 28                | 14                   |
| 95 <sup>th</sup> percentile   | 11                 | 3                     | 236                      | 50                          | 47                | 34                   |
| 97.5 <sup>th</sup> percentile | 12                 | 3                     | 281                      | 70                          | 50                | 56                   |

\*Standard deviation
