# Supplementary material for: The Canadian Cow-Calf Surveillance Network – productivity and health summary 2018 to 2022
Source: PubMed Central journal article supplement (PMC11040676; doi:10.3389/fvets.2024.1392166), 2024-04-10
Supplement: Table_7.pdf [file Table_7.pdf]

**Supplemental tables 7a, 7b:**

## **The Canadian Cow-calf Surveillance Network – Productivity and Health Data 2018 to 2022**

**Cheryl Waldner<sup>1\*</sup>, M. Claire Windeyer<sup>2</sup>, Marjolaine Rousseau<sup>3</sup>, John Campbell<sup>1</sup>**

<sup>1</sup>Large Animal Clinical Sciences, University of Saskatchewan, Saskatoon, SK, Canada

<sup>2</sup>Faculty of Veterinary Medicine, University of Calgary, Calgary, AB, Canada

<sup>3</sup>Département de sciences cliniques, Faculté de médecine vétérinaire, Université de Montréal, Saint-Hyacinthe, QC, Canada

**Table S7a.** Summary of percentage of females bred using reproductive technologies and breeding season duration for **Western Canadian** cow-calf herds reported in submitted annual herd breeding to weaning records (n=364) for the C3SN between 2019 and 2022.

|                               | Percent of cows bred AI/ET | Percent of heifers bred AI/ET | Breeding season length cows (days) | Breeding season length heifers (days) |
|-------------------------------|----------------------------|-------------------------------|------------------------------------|---------------------------------------|
| Total herd records            | N=363                      | N=347                         | N=357                              | N=338                                 |
| Mean                          | 6.4%                       | 17.2%                         | 85                                 | 78                                    |
| SD*                           | 16.5%                      | 33.1%                         | 35                                 | 37                                    |
| 2.5 <sup>th</sup> percentile  | 0.0%                       | 0.0%                          | 45                                 | 25                                    |
| 5 <sup>th</sup> percentile    | 0.0%                       | 0.0%                          | 48                                 | 30                                    |
| 25 <sup>th</sup> percentile   | 0.0%                       | 0.0%                          | 61                                 | 50                                    |
| Median                        | 0.0%                       | 0.0%                          | 74                                 | 68                                    |
| 75 <sup>th</sup> percentile   | 0.0%                       | 5.3%                          | 99                                 | 98                                    |
| 95 <sup>th</sup> percentile   | 47.3%                      | 99.5%                         | 162                                | 146                                   |
| 97.5 <sup>th</sup> percentile | 60.9%                      | 100%                          | 173                                | 165                                   |

\*Standard deviation

**Table S7b.** Summary of percentage of females bred using reproductive technologies and breeding season duration for **Eastern Canadian** cow-calf herds reported in submitted annual herd breeding to weaning records (n=179) for the C3SN between 2019 and 2022.

|                               | Percent of cows bred AI/ET | Percent of heifers bred AI/ET | Breeding season length cows (days) | Breeding season length heifers (days) |
|-------------------------------|----------------------------|-------------------------------|------------------------------------|---------------------------------------|
| Total herd records            | N=179                      | N=159                         | N=162                              | N=154                                 |
| Mean                          | 23.6%                      | 37.5%                         | 136                                | 116                                   |
| SD*                           | 31.2%                      | 42.5%                         | 70                                 | 58                                    |
| 2.5 <sup>th</sup> percentile  | 179                        | 159                           | 53                                 | 44                                    |
| 5 <sup>th</sup> percentile    | 23.6%                      | 37.5%                         | 57                                 | 47                                    |
| 25 <sup>th</sup> percentile   | 31.2%                      | 42.5%                         | 80                                 | 72                                    |
| Median                        | 0.0%                       | 0.0%                          | 114                                | 102                                   |
| 75 <sup>th</sup> percentile   | 0.0%                       | 0.0%                          | 184                                | 146                                   |
| 95 <sup>th</sup> percentile   | 0.0%                       | 0.0%                          | 259                                | 233                                   |
| 97.5 <sup>th</sup> percentile | 7.3%                       | 8.3%                          | 291                                | 262                                   |

\*Standard deviation
