# Supplementary material for: The Canadian Cow-Calf Surveillance Network – productivity and health summary 2018 to 2022
Source: PubMed Central journal article supplement (PMC11040676; doi:10.3389/fvets.2024.1392166), 2024-04-10
Supplement: Table_8.pdf [file Table_8.pdf]

**Supplemental tables 8a, 8b, 8c:**

## **The Canadian Cow-calf Surveillance Network – Productivity and Health Data 2018 to 2022**

**Cheryl Waldner<sup>1\*</sup>, M. Claire Windeyer<sup>2</sup>, Marjolaine Rousseau<sup>3</sup>, John Campbell<sup>1</sup>**

<sup>1</sup>Large Animal Clinical Sciences, University of Saskatchewan, Saskatoon, SK, Canada

<sup>2</sup>Faculty of Veterinary Medicine, University of Calgary, Calgary, AB, Canada

<sup>3</sup>Département de sciences cliniques, Faculté de médecine vétérinaire, Université de Montréal, Saint-Hyacinthe, QC, Canada

**Table S8a.** Summary of number of females pregnancy tested by a veterinarian and percentage of tested cows that were not pregnant for **Western Canadian** cow-calf herds reported in submitted annual herd breeding to weaning records (n=364) for the C3SN between 2019 and 2022.

|                               | Number of cows pregnancy tested | Number of heifers pregnancy tested | Number of all females pregnancy tested | Percent of cows not pregnant | Percent of heifers not pregnant | Percent of all females not pregnant |
|-------------------------------|---------------------------------|------------------------------------|----------------------------------------|------------------------------|---------------------------------|-------------------------------------|
| Total herd records            | N=341                           | N=334                              | N=341                                  | N=341                        | N=334                           | N=341                               |
| Mean                          | 227                             | 50                                 | 274                                    | 7.5%                         | 10.6%                           | 8.2%                                |
| SD*                           | 184                             | 49                                 | 223                                    | 4.8%                         | 10.0%                           | 5.0%                                |
| 2.5 <sup>th</sup> percentile  | 32                              | 6                                  | 48                                     | 0.0%                         | 0.0%                            | 1.3%                                |
| 5 <sup>th</sup> percentile    | 45                              | 10                                 | 64                                     | 1.4%                         | 0.0%                            | 2.2%                                |
| 25 <sup>th</sup> percentile   | 111                             | 21                                 | 130                                    | 4.1%                         | 4.0%                            | 4.5%                                |
| Median                        | 177                             | 35                                 | 216                                    | 6.8%                         | 8.3%                            | 7.2%                                |
| 75 <sup>th</sup> percentile   | 287                             | 60                                 | 340                                    | 9.9%                         | 14.2%                           | 10.6%                               |
| 95 <sup>th</sup> percentile   | 585                             | 129                                | 711                                    | 16.8%                        | 31.5%                           | 17.3%                               |
| 97.5 <sup>th</sup> percentile | 858                             | 197                                | 998                                    | 18.3%                        | 37.4%                           | 20.3%                               |

\*Standard deviation

**Table S8b.** Summary of number of females pregnancy tested by a veterinarian and percentage of tested cows that were not pregnant for **Eastern Canadian** cow-calf herds reported in submitted annual herd breeding to weaning records (n=179) for the C3SN between 2019 and 2022.

|                               | Number of cows pregnancy tested | Number of heifers pregnancy tested | Number of all females pregnancy tested | Percent of cows not pregnant | Percent of heifers not pregnant | Percent of all females not pregnant |
|-------------------------------|---------------------------------|------------------------------------|----------------------------------------|------------------------------|---------------------------------|-------------------------------------|
| Total herd records            | N=166                           | N=149                              | N=166                                  | N=166                        | N=149                           | N=166                               |
| Mean                          | 82                              | 18                                 | 97                                     | 8.0%                         | 8.0%                            | 8.1%                                |
| SD*                           | 85                              | 22                                 | 100                                    | 7.1%                         | 13.4%                           | 6.6%                                |
| 2.5 <sup>th</sup> percentile  | 9                               | 2                                  | 11                                     | 0.0%                         | 0.0%                            | 0.0%                                |
| 5 <sup>th</sup> percentile    | 10                              | 2                                  | 17                                     | 0.0%                         | 0.0%                            | 1.0%                                |
| 25 <sup>th</sup> percentile   | 41                              | 7                                  | 49                                     | 3.5%                         | 0.0%                            | 3.8%                                |
| Median                        | 66                              | 11                                 | 80                                     | 5.9%                         | 0.0%                            | 5.9%                                |
| 75 <sup>th</sup> percentile   | 90                              | 18                                 | 99                                     | 10.5%                        | 10.0%                           | 10.2%                               |
| 95 <sup>th</sup> percentile   | 232                             | 67                                 | 264                                    | 20.0%                        | 35.3%                           | 20.8%                               |
| 97.5 <sup>th</sup> percentile | 278                             | 86                                 | 297                                    | 24.0%                        | 50.0%                           | 24.8%                               |

\*Standard deviation

**Table S8c.** Summary of number of females pregnancy tested by a veterinarian and percentage of tested females that were not pregnant for Canadian cow-calf herds reported in submitted annual herd breeding to weaning records (n=543) for the C3SN between 2019 and 2022 (**including only herds that reported all females were pregnancy tested**).

|                               | Number of cows pregnancy tested | Number of heifers pregnancy tested | Number of all females pregnancy tested | Percent of cows not pregnant | Percent of heifers not pregnant | Percent of all females not pregnant |
|-------------------------------|---------------------------------|------------------------------------|----------------------------------------|------------------------------|---------------------------------|-------------------------------------|
| Total herd records            | N = 442                         | N = 418                            | N = 442                                | N = 442                      | N = 418                         | N = 442                             |
| Mean                          | 189                             | 40                                 | 226                                    | 7.6%                         | 10.1%                           | 8.1%                                |
| SD*                           | 178                             | 47                                 | 217                                    | 5.0%                         | 11.2%                           | 5.2%                                |
| 2.5 <sup>th</sup> percentile  | 31                              | 3                                  | 38                                     | 0.8%                         | 0.0%                            | 1.2%                                |
| 5 <sup>th</sup> percentile    | 36                              | 5                                  | 44                                     | 1.4%                         | 0.0%                            | 2.0%                                |
| 25 <sup>th</sup> percentile   | 72                              | 12                                 | 84                                     | 4.0%                         | 0.0%                            | 4.3%                                |
| Median                        | 131                             | 25                                 | 160                                    | 6.5%                         | 7.1%                            | 6.9%                                |
| 75 <sup>th</sup> percentile   | 245                             | 51                                 | 291                                    | 10.0%                        | 14.3%                           | 10.8%                               |
| 95 <sup>th</sup> percentile   | 465                             | 126                                | 644                                    | 16.9%                        | 33.3%                           | 19.1%                               |
| 97.5 <sup>th</sup> percentile | 779                             | 159                                | 870                                    | 18.8%                        | 40.1%                           | 20.8%                               |

\*Standard deviation
