# Supplementary material for: The Canadian Cow-Calf Surveillance Network – productivity and health summary 2018 to 2022
Source: PubMed Central journal article supplement (PMC11040676; doi:10.3389/fvets.2024.1392166), 2024-04-10
Supplement: Table_9.pdf [file Table_9.pdf]

**Supplemental tables 9a, 9b:**

## **The Canadian Cow-calf Surveillance Network – Productivity and Health Data 2018 to 2022**

**Cheryl Waldner<sup>1\*</sup>, M. Claire Windeyer<sup>2</sup>, Marjolaine Rousseau<sup>3</sup>, John Campbell<sup>1</sup>**

<sup>1</sup>Large Animal Clinical Sciences, University of Saskatchewan, Saskatoon, SK, Canada

<sup>2</sup>Faculty of Veterinary Medicine, University of Calgary, Calgary, AB, Canada

<sup>3</sup>Département de sciences cliniques, Faculté de médecine vétérinaire, Université de Montréal, Saint-Hyacinthe, QC, Canada

**Table S9a.** Summary of calving death loss from 24 hours to weaning from **Western Canadian** cow-calf herds reported in submitted breeding to weaning records (n=364) for the C3SN between 2019 and 2022.

|                               | Calves alive at 24 hours |         |       | Percent of calves dead 24 h to weaning |         |       |
|-------------------------------|--------------------------|---------|-------|----------------------------------------|---------|-------|
|                               | Cows                     | Heifers | Total | Cows                                   | Heifers | Total |
| Total herd records            | N=364                    | N=348   | N=364 | N=364                                  | N=329   | N=364 |
| Mean                          | 212                      | 39      | 249   | 3.4%                                   | 4.9%    | 3.6%  |
| SD*                           | 207                      | 37      | 231   | 3.1%                                   | 7.7%    | 3.1%  |
| 2.5 <sup>th</sup> percentile  | 38                       | 0       | 45    | 0.0%                                   | 0.0%    | 0.0%  |
| 5 <sup>th</sup> percentile    | 45                       | 3       | 57    | 0.0%                                   | 0.0%    | 0.0%  |
| 25 <sup>th</sup> percentile   | 102                      | 15      | 125   | 1.5%                                   | 0.0%    | 1.6%  |
| Median                        | 168                      | 29      | 200   | 2.7%                                   | 2.9%    | 2.9%  |
| 75 <sup>th</sup> percentile   | 261                      | 49      | 315   | 4.4%                                   | 6.9%    | 4.7%  |
| 95 <sup>th</sup> percentile   | 456                      | 102     | 565   | 9.4%                                   | 17.6%   | 9.6%  |
| 97.5 <sup>th</sup> percentile | 766                      | 147     | 870   | 11.3%                                  | 20.0%   | 11.6% |

\*Standard deviation

**Table S9b.** Summary of calving death loss from 24 hours to weaning from **Eastern Canadian** cow-calf herds reported in submitted breeding to weaning records (n=179) for the C3SN between 2019 and 2022.

|                               | Calves alive at 24 hours |         |       | Percent of calves dead 24 h to weaning |         |       |
|-------------------------------|--------------------------|---------|-------|----------------------------------------|---------|-------|
|                               | Cows                     | Heifers | Total | Cows                                   | Heifers | Total |
| Total herd records            | N=179                    | N=166   | N=179 | N=178                                  | N=152   | N=178 |
| Mean                          | 84                       | 12      | 96    | 4.7%                                   | 6.9%    | 4.9%  |
| SD*                           | 78                       | 16      | 89    | 5.6%                                   | 10.6%   | 5.2%  |
| 2.5 <sup>th</sup> percentile  | 23                       | 0       | 25    | 0.0%                                   | 0.0%    | 0.0%  |
| 5 <sup>th</sup> percentile    | 28                       | 0       | 30    | 0.0%                                   | 0.0%    | 0.0%  |
| 25 <sup>th</sup> percentile   | 40                       | 5       | 46    | 1.5%                                   | 0.0%    | 1.9%  |
| Median                        | 66                       | 9       | 77    | 3.4%                                   | 0.0%    | 3.7%  |
| 75 <sup>th</sup> percentile   | 92                       | 14      | 105   | 5.9%                                   | 10.1%   | 6.5%  |
| 95 <sup>th</sup> percentile   | 237                      | 33      | 260   | 14.1%                                  | 33.3%   | 13.9% |
| 97.5 <sup>th</sup> percentile | 281                      | 50      | 289   | 18.4%                                  | 34.0%   | 18.5% |

\*Standard deviation
