# Supplementary material for: The Canadian Cow-Calf Surveillance Network – productivity and health summary 2018 to 2022
Source: PubMed Central journal article supplement (PMC11040676; doi:10.3389/fvets.2024.1392166), 2024-04-10
Supplement: Table_10.pdf [file Table_10.pdf]

**Supplemental tables 10a, 10b:**

## **The Canadian Cow-calf Surveillance Network – Productivity and Health Data 2018 to 2022**

**Cheryl Waldner<sup>1\*</sup>, M. Claire Windeyer<sup>2</sup>, Marjolaine Rousseau<sup>3</sup>, John Campbell<sup>1</sup>**

<sup>1</sup>Large Animal Clinical Sciences, University of Saskatchewan, Saskatoon, SK, Canada

<sup>2</sup>Faculty of Veterinary Medicine, University of Calgary, Calgary, AB, Canada

<sup>3</sup>Département de sciences cliniques, Faculté de médecine vétérinaire, Université de Montréal, Saint-Hyacinthe, QC, Canada

**Table S10a.** Summary of calf treatment and death loss for diarrhea, respiratory disease, and navel or joint infection from 24 hours to weaning from **Western Canadian** cow-calf herds reported in submitted breeding to weaning records (n=364) for the C3SN between 2019 and 2022.

|                               | Percent of calves reported treated with antibiotics 24 h to weaning |                     |                          | Percent of calves dead with attributed cause 24 h to weaning |                     |                          |       |
|-------------------------------|---------------------------------------------------------------------|---------------------|--------------------------|--------------------------------------------------------------|---------------------|--------------------------|-------|
|                               | Calf diarrhea                                                       | Respiratory disease | Navel or joint infection | Calf diarrhea                                                | Respiratory disease | Navel or joint infection | Total |
| Total herd records            | N=362                                                               | N=362               | N=362                    | N=362                                                        | N=362               | N=362                    | N=362 |
| Mean                          | 2.3%                                                                | 4.6%                | 1.8%                     | 0.40%                                                        | 0.57%               | 0.13%                    | 1.1%  |
| SD*                           | 4.3%                                                                | 8.8%                | 3.4%                     | 1.1%                                                         | 1.0%                | 0.36%                    | 1.8%  |
| 2.5 <sup>th</sup> percentile  | 0.0%                                                                | 0.0%                | 0.0%                     | 0.0%                                                         | 0.0%                | 0.0%                     | 0.0%  |
| 5 <sup>th</sup> percentile    | 0.0%                                                                | 0.0%                | 0.0%                     | 0.0%                                                         | 0.0%                | 0.0%                     | 0.0%  |
| 25 <sup>th</sup> percentile   | 0.0%                                                                | 0.3%                | 0.0%                     | 0.0%                                                         | 0.0%                | 0.0%                     | 0.0%  |
| Median                        | 0.7%                                                                | 1.7%                | 0.5%                     | 0.0%                                                         | 0.0%                | 0.0%                     | 0.47% |
| 75 <sup>th</sup> percentile   | 2.8%                                                                | 4.7%                | 2.0%                     | 0.42%                                                        | 0.78%               | 0.0%                     | 1.6%  |
| 95 <sup>th</sup> percentile   | 9.2%                                                                | 19.0%               | 7.8%                     | 1.8%                                                         | 2.5%                | 0.91%                    | 4.6%  |
| 97.5 <sup>th</sup> percentile | 15.4%                                                               | 26.8%               | 10.3%                    | 2.7%                                                         | 3.7%                | 1.3%                     | 6.1%  |

\*Standard deviation

**Table S10b.** Summary of calf treatment and death loss for diarrhea, respiratory disease, and navel or joint infection from 24 hours to weaning from **Eastern Canadian** cow-calf herds reported in submitted breeding to weaning records (n=364) for the C3SN between 2019 and 2022.

|                               | Percent of calves reported treated with antibiotics 24 h to weaning |                     |                          | Percent of calves dead with attributed cause 24 h to weaning |                     |                          |       |
|-------------------------------|---------------------------------------------------------------------|---------------------|--------------------------|--------------------------------------------------------------|---------------------|--------------------------|-------|
|                               | Calf diarrhea                                                       | Respiratory disease | Navel or joint infection | Calf diarrhea                                                | Respiratory disease | Navel or joint infection | Total |
| Total herd records            | N=179                                                               | N=179               | N=179                    | N=179                                                        | N=179               | N=179                    | N=179 |
| Mean                          | 8.1%                                                                | 6.6%                | 2.9%                     | 1.2%                                                         | 1.1%                | 0.32%                    | 2.6%  |
| SD*                           | 15.2%                                                               | 18.0%               | 4.6%                     | 2.8%                                                         | 4.7%                | 1.5%                     | 6.7%  |
| 2.5 <sup>th</sup> percentile  | 0.0%                                                                | 0.0%                | 0.0%                     | 0.00%                                                        | 0.00%               | 0.00%                    | 0.00% |
| 5 <sup>th</sup> percentile    | 0.0%                                                                | 0.0%                | 0.0%                     | 0.00%                                                        | 0.00%               | 0.00%                    | 0.00% |
| 25 <sup>th</sup> percentile   | 0.0%                                                                | 0.0%                | 0.0%                     | 0.00%                                                        | 0.00%               | 0.00%                    | 0.00% |
| Median                        | 3.3%                                                                | 1.7%                | 1.1%                     | 0.00%                                                        | 0.00%               | 0.00%                    | 0.33% |
| 75 <sup>th</sup> percentile   | 9.2%                                                                | 6.1%                | 3.9%                     | 1.2%                                                         | 0.82%               | 0.00%                    | 2.6%  |
| 95 <sup>th</sup> percentile   | 30.0%                                                               | 20.3%               | 12.7%                    | 5.7%                                                         | 3.0%                | 1.9%                     | 9.9%  |
| 97.5 <sup>th</sup> percentile | 62.3%                                                               | 36.9%               | 17.4%                    | 7.5%                                                         | 4.7%                | 2.8%                     | 16.0% |

\*Standard deviation
