# Supplementary material for: The Canadian Cow-Calf Surveillance Network – productivity and health summary 2018 to 2022
Source: PubMed Central journal article supplement (PMC11040676; doi:10.3389/fvets.2024.1392166), 2024-04-10
Supplement: Table_11.pdf [file Table_11.pdf]

**Supplemental tables 11a, 11b:**

## **The Canadian Cow-calf Surveillance Network – Productivity and Health Data 2018 to 2022**

**Cheryl Waldner<sup>1\*</sup>, M. Claire Windeyer<sup>2</sup>, Marjolaine Rousseau<sup>3</sup>, John Campbell<sup>1</sup>**

<sup>1</sup>Large Animal Clinical Sciences, University of Saskatchewan, Saskatoon, SK, Canada

<sup>2</sup>Faculty of Veterinary Medicine, University of Calgary, Calgary, AB, Canada

<sup>3</sup>Département de sciences cliniques, Faculté de médecine vétérinaire, Université de Montréal, Saint-Hyacinthe, QC, Canada

**Table S11a.** Reproductive indices for comparison from **herds from Western Canada** for 2019 to 2022 and 2014 to 2017 (*previously reported in (19) and reproduced with permission from open access source*).

| Herd Summary Statistics     | Percent of females not pregnant when tested (2014-2017) |                | Percent of females not pregnant when tested (2019-2022) |                | Abortion cumulative incidence (2014-2017) |                | Abortion cumulative incidence (2019-2022) |                |
|-----------------------------|---------------------------------------------------------|----------------|---------------------------------------------------------|----------------|-------------------------------------------|----------------|-------------------------------------------|----------------|
|                             | <i>Cows</i>                                             | <i>Heifers</i> | <i>Cows</i>                                             | <i>Heifers</i> | <i>Cows</i>                               | <i>Heifers</i> | <i>Cows</i>                               | <i>Heifers</i> |
| Mean                        | 6.8%                                                    | 9.7%           | 7.5%                                                    | 10.5%          | 0.8%                                      | 1.3%           | 1.5%                                      | 3.0%           |
| SD*                         | 3.4%                                                    | 8.2%           | 4.8%                                                    | 9.8%           | 0.9%                                      | 2.3%           | 1.7%                                      | 9.4%           |
| 5 <sup>th</sup> percentile  | 2.2%                                                    | 0.0%           | 1.4%                                                    | 0.0%           | 0.0%                                      | 0.0%           | 0.0%                                      | 0.0%           |
| 25 <sup>th</sup> percentile | 4.3%                                                    | 4.2%           | 4.1%                                                    | 4.2%           | 0.0%                                      | 0.0%           | 0.6%                                      | 0.0%           |
| Median                      | 6.2%                                                    | 8.3%           | 6.8%                                                    | 8.3%           | 0.7%                                      | 0.0%           | 1.1%                                      | 0.0%           |
| 75 <sup>th</sup> percentile | 8.9%                                                    | 12.9%          | 9.9%                                                    | 13.8%          | 1.2%                                      | 2.1%           | 2.1%                                      | 3.5%           |
| 95 <sup>th</sup> percentile | 12.8%                                                   | 24.1%          | 16.8%                                                   | 30.6%          | 2.6%                                      | 5.6%           | 4.4%                                      | 9.2%           |
| Observations                | 276                                                     | 270            | 340                                                     | 318            | 353                                       | 338            | 373                                       | 355            |
| Number of herds             | 94                                                      | 90             | 108                                                     | 106            | 105                                       | 104            | 112                                       | 110            |

\*Standard deviation

**Table S11b.** Reproductive indices for comparison from **herds from Western Canada** for 2019 to 2022 and 2014 to 2017 (*previously reported (19) and reproduced with permission from open access source*).

| Herd Summary Statistics     | Cumulative incidence of calf death from birth – 24 hours (2014-2017) |                | Cumulative incidence of calf death from birth – 24 hours (2019-2022) |                | Cumulative incidence of calf death from 24 hours to weaning (2014-2017) |                | Cumulative incidence of calf death from 24 hours to weaning (2019-2022) |                |
|-----------------------------|----------------------------------------------------------------------|----------------|----------------------------------------------------------------------|----------------|-------------------------------------------------------------------------|----------------|-------------------------------------------------------------------------|----------------|
|                             | <i>Cows</i>                                                          | <i>Heifers</i> | <i>Cows</i>                                                          | <i>Heifers</i> | <i>Cows</i>                                                             | <i>Heifers</i> | <i>Cows</i>                                                             | <i>Heifers</i> |
| Mean                        | 2.1%                                                                 | 3.6%           | 2.1%                                                                 | 3.7%           | 2.5%                                                                    | 2.9%           | 3.4%                                                                    | 4.9%           |
| SD*                         | 1.6%                                                                 | 4.5%           | 1.7%                                                                 | 4.3%           | 2.4%                                                                    | 3.9%           | 3.1%                                                                    | 7.7%           |
| 5 <sup>th</sup> percentile  | 0.0%                                                                 | 0.0%           | 0.0%                                                                 | 0.0%           | 0.0%                                                                    | 0.0%           | 0.0%                                                                    | 0.0%           |
| 25 <sup>th</sup> percentile | 1.0%                                                                 | 0.0%           | 1.0%                                                                 | 0.0%           | 1.1%                                                                    | 0.0%           | 1.5%                                                                    | 0.0%           |
| Median                      | 1.8%                                                                 | 2.6%           | 1.8%                                                                 | 2.8%           | 1.9%                                                                    | 1.5%           | 2.7%                                                                    | 2.9%           |
| 75 <sup>th</sup> percentile | 2.8%                                                                 | 5.3%           | 3.1%                                                                 | 5.7%           | 3.3%                                                                    | 4.6%           | 4.4%                                                                    | 6.9%           |
| 95 <sup>th</sup> percentile | 4.8%                                                                 | 11.5%          | 5.3%                                                                 | 11.1%          | 6.9%                                                                    | 10.4%          | 9.4%                                                                    | 17.6%          |
| Observations                | 359                                                                  | 345            | 378                                                                  | 358            | 350                                                                     | 332            | 364                                                                     | 329            |
| Number of herds             | 105                                                                  | 105            | 114                                                                  | 112            | 105                                                                     | 105            | 112                                                                     | 108            |

\*Standard deviation
