# Supplementary material for: The Canadian Cow-Calf Surveillance Network – productivity and health summary 2018 to 2022
Source: PubMed Central journal article supplement (PMC11040676; doi:10.3389/fvets.2024.1392166), 2024-04-10
Supplement: Table_12.pdf [file Table_12.pdf]

**Supplemental table 12:**

**The Canadian Cow-calf Surveillance Network – Productivity and Health Data 2018 to 2022**

**Cheryl Waldner<sup>1\*</sup>, M. Claire Windeyer<sup>2</sup>, Marjolaine Rousseau<sup>3</sup>, John Campbell<sup>1</sup>**

<sup>1</sup>Large Animal Clinical Sciences, University of Saskatchewan, Saskatoon, SK, Canada

<sup>2</sup>Faculty of Veterinary Medicine, University of Calgary, Calgary, AB, Canada

<sup>3</sup>Département de sciences cliniques, Faculté de médecine vétérinaire, Université de Montréal, Saint-Hyacinthe, QC, Canada

**Table S12.** Mean production indices (SD\*) of herds from Western Canada (N) by year of testing 2019-2022 compared to data from 2014-2017 (previously reported (19) and reproduced with permission from open access source).

|                                                          |         | 2014               | 2015               | 2016                | 2017               | 2019                 | 2020                 | 2021                | 2022                 |
|----------------------------------------------------------|---------|--------------------|--------------------|---------------------|--------------------|----------------------|----------------------|---------------------|----------------------|
| Percent of females not pregnant at pregnancy testing     | Cows    | 6.7% (2.7)<br>N=69 | 6.6% (3.9)<br>N=75 | 6.8% (3.5)<br>N=73  | 7.1% (3.7)<br>N=59 | 7.2% (4.5)<br>N=109  | 7.1% (4.2)<br>N=97   | 8.2% (5.8)<br>N=82  | 7.7% (5.0)<br>N=76   |
|                                                          | Heifers | 9.1% (7.3)<br>N=65 | 9.6% (8.5)<br>N=75 | 10.1% (7.9)<br>N=72 | 9.9% (9.1)<br>N=58 | 9.9% (8.5)<br>N=109  | 10.1% (9.5)<br>N=97  | 9.5% (8.7)<br>N=82  | 13.2% (12.4)<br>N=76 |
| Abortion cumulative incidence                            | Cows    | 1.0% (1.0)<br>N=83 | 0.7% (0.7)<br>N=93 | 0.8% (0.9)<br>N=91  | 0.9% (0.8)<br>N=86 | 1.5% (1.4)<br>N=113  | 1.6% (1.5)<br>N=101  | 1.5% (1.5)<br>N=85  | 1.6% (2.4)<br>N=80   |
|                                                          | Heifers | 1.6% (2.5)<br>N=79 | 0.9% (1.9)<br>N=90 | 1.5% (2.9)<br>N=86  | 1.4% (2.0)<br>N=83 | 2.7% (8.4)<br>N=113  | 3.2% (10.6)<br>N=101 | 3.8% (12.2)<br>N=85 | 2.3% (3.4)<br>N=80   |
| Cumulative incidence of calf death from birth – 24 hours | Cows    | 2.4% (1.6)<br>N=84 | 2.0% (1.4)<br>N=93 | 1.9% (1.4)<br>N=95  | 2.1% (1.9)<br>N=87 | 2.2% (1.9)<br>N=113  | 2.1% (1.5)<br>N=101  | 1.9% (1.4)<br>N=85  | 2.3% (1.9)<br>N=80   |
|                                                          | Heifers | 4.7% (5.7)<br>N=79 | 3.8% (4.3)<br>N=90 | 3.0% (4.0)<br>N=92  | 2.9% (3.8)<br>N=84 | 3.8% (4.5)<br>N=113  | 3.9% (4.1)<br>N=101  | 3.2% (4.7)<br>N=85  | 3.6% (3.7)<br>N=80   |
| Cumulative incidence of calf death (24 hours-weaning)    | Cows    | 2.7% (2.8)<br>N=84 | 2.4% (2.0)<br>N=94 | 2.3% (1.8)<br>N=93  | 2.9% (2.9)<br>N=90 | 3.7% (3.3)<br>N=109  | 3.6% (3.5)<br>N=97   | 2.8% (2.1)<br>N=82  | 3.5% (3.1)<br>N=76   |
|                                                          | Heifers | 3.4% (4.7)<br>N=78 | 2.1% (2.8)<br>N=90 | 3.2% (4.1)<br>N=90  | 2.8% (3.8)<br>N=90 | 6.1% (11.2)<br>N=109 | 4.2% (5.2)<br>N=97   | 4.0% (5.1)<br>N=82  | 4.8% (6.4)<br>N=76   |

\*Standard deviation
