# Supplementary material for: The Canadian Cow-Calf Surveillance Network – productivity and health summary 2018 to 2022
Source: PubMed Central journal article supplement (PMC11040676; doi:10.3389/fvets.2024.1392166), 2024-04-10
Supplement: Table_13.pdf [file Table_13.pdf]

**Supplemental table 13:**

**The Canadian Cow-calf Surveillance Network – Productivity and Health Data 2018 to 2022**

**Cheryl Waldner<sup>1\*</sup>, M. Claire Windeyer<sup>2</sup>, Marjolaine Rousseau<sup>3</sup>, John Campbell<sup>1</sup>**

<sup>1</sup>Large Animal Clinical Sciences, University of Saskatchewan, Saskatoon, SK, Canada

<sup>2</sup>Faculty of Veterinary Medicine, University of Calgary, Calgary, AB, Canada

<sup>3</sup>Département de sciences cliniques, Faculté de médecine vétérinaire, Université de Montréal, Saint-Hyacinthe, QC, Canada

**Table S13.** Mean production indices (SD\*) of herds (N) from Eastern Canada by year of testing 2019-2022.

|                                                          |         | 2019                 | 2020                | 2021                | 2022                |
|----------------------------------------------------------|---------|----------------------|---------------------|---------------------|---------------------|
| Percent of females not pregnant at pregnancy testing     | Cows    | 8.5% (6.5)<br>N=46   | 8.4% (4.9)<br>N=40  | 6.6% (5.9)<br>N=33  | 7.1% (6.5)<br>N=28  |
|                                                          | Heifers | 14.0% (19.1)<br>N=46 | 8.2% (11.4)<br>N=40 | 5.0% (6.8)<br>N=33  | 3.3% (4.1)<br>N=28  |
| Abortion cumulative incidence                            | Cows    | 2.3% (3.1)<br>N=58   | 1.2% (1.8)<br>N=51  | 1.3% (1.5)<br>N=40  | 1.6% (2.1)<br>N=37  |
|                                                          | Heifers | 2.1% (5.8)<br>N=58   | 3.3% (6.3)<br>N=51  | 0.9% (2.8)<br>N=40  | 1.2% (3.3)<br>N=37  |
| Cumulative incidence of calf death from birth – 24 hours | Cows    | 3.8% (3.5)<br>N=58   | 3.2% (2.8)<br>N=51  | 2.9% (2.6)<br>N=40  | 3.0% (2.9)<br>N=36  |
|                                                          | Heifers | 3.9% (3.3)<br>N=58   | 4.9% (2.5)<br>N=51  | 3.9% (2.7)<br>N=40  | 4.8% (3.1)<br>N=36  |
| Cumulative incidence of calf death (24 hours-weaning)    | Cows    | 5.5% (7.9)<br>N=58   | 4.3% (4.6)<br>N=49  | 4.1% (3.7)<br>N=39  | 4.6% (3.5)<br>N=33  |
|                                                          | Heifers | 7.3% (9.7)<br>N=58   | 7.6% (11.9)<br>N=49 | 5.4% (10.5)<br>N=39 | 6.9% (10.5)<br>N=33 |

\*Standard deviation
